# Supplementary material
Source: PubMed Central journal article supplement (PMC4936918)
Supplement: NIHMS795614-supplement-S_Tables.pdf [file NIHMS795614-supplement-S_Tables.pdf]

Table S1. Clinical characteristics and metabolic parameters of 16 surgical patients

| Variable                    |                 |
|-----------------------------|-----------------|
| n (Male/Female)             | 16 (11/5)       |
| Age (years)                 | 69.1 ± 10.9     |
| BMI (kg/m <sup>2</sup> )    | 22.8 ± 3.5      |
| WC (cm)                     | 72.7 ± 14.2     |
| VAT area (cm <sup>2</sup> ) | 64.0 ± 16.3     |
| SAT area (cm <sup>2</sup> ) | 83.5 ± 14.0     |
| FPG (mmol/L)                | 5.1 ± 0.5       |
| HbA1c (%)                   | 5.6 ± 0.3       |
| TG (mmol/L)                 | 1.4 [1.0-2.0]   |
| HDL-C (mmol/L)              | 1.1 ± 0.3       |
| LDL-C (mmol/L)              | 2.7 ± 0.7       |
| Leptin (ng/mL)              | 4.7 [2.5-7.7]   |
| Adiponectin (µg/mL)         | 7.6 [5.3-10.4]  |
| hsCRP (µg/mL)               | 0.9 [0.4-1.0]   |
| Serum THBS1 (µg/mL)         | 10.0 [9.4-17.3] |

Data are shown as the mean ± SD or median and interquartile ranges.

Table S2. Correlation analyses of adipose *THBS1* expression for metabolic parameters

| Variable           | SAT <i>THBS1</i> mRNA |          | VAT <i>THBS1</i> mRNA |          |
|--------------------|-----------------------|----------|-----------------------|----------|
|                    | $\gamma_s$            | <i>P</i> | $\gamma_s$            | <i>P</i> |
| BMI                | -0.01                 | 0.966    | 0.54                  | 0.033*   |
| WC                 | 0.16                  | 0.544    | 0.54                  | 0.029*   |
| VAT area           | -0.35                 | 0.262    | 0.00                  | > 0.999  |
| SAT area           | -0.39                 | 0.216    | 0.06                  | 0.854    |
| FPG                | -0.16                 | 0.544    | -0.01                 | 0.957    |
| HbA1c              | -0.29                 | 0.272    | -0.19                 | 0.486    |
| TG                 | -0.09                 | 0.752    | 0.41                  | 0.114    |
| HDL-C              | -0.09                 | 0.735    | -0.56                 | 0.024*   |
| LDL-C              | -0.26                 | 0.338    | -0.24                 | 0.380    |
| Leptin             | 0.50                  | 0.051    | -0.14                 | 0.617    |
| Adiponectin        | -0.42                 | 0.103    | -0.13                 | 0.633    |
| hsCRP              | -0.16                 | 0.560    | -0.04                 | 0.880    |
| Serum <i>THBS1</i> | 0.06                  | 0.852    | 0.01                  | 0.970    |

Spearman's rank correlation coefficient ( $\gamma_s$ ) was used to assess the relationships among the study variables. \**P* < 0.05 (statistically significant).

Table S3. Baseline characteristics and metabolic parameters of female subjects

| Variable                    | Premenopausal     | Postmenopausal    | <i>P</i> |
|-----------------------------|-------------------|-------------------|----------|
| n                           | 42                | 44                |          |
| Age (years)                 | 39.1 ± 6.9        | 60.9 ± 6.8        | < 0.001* |
| BMI (kg/m <sup>2</sup> )    | 32.1 ± 7.9        | 30.1 ± 5.4        | 0.177    |
| WC (cm)                     | 99.0 ± 15.4       | 99.5 ± 13.8       | 0.864    |
| VAT area (cm <sup>2</sup> ) | 87.4 ± 52.2       | 108.3 ± 46.3      | 0.071    |
| SAT area (cm <sup>2</sup> ) | 274.3 ± 123.0     | 283.6 ± 105.7     | 0.728    |
| SBP (mmHg)                  | 136.8 ± 21.9      | 135.1 ± 18.2      | 0.701    |
| DBP (mmHg)                  | 84.1 ± 13.6       | 81.1 ± 11.0       | 0.280    |
| FPG (mmol/L)                | 5.6 ± 1.5         | 6.2 ± 1.8         | 0.104    |
| HbA1c (%)                   | 5.9 ± 1.1         | 6.5 ± 1.2         | 0.020*   |
| IRI (pmol/L)                | 69.6 [37.2-144.5] | 69.6 [41.3-102.8] | 0.685    |
| HOMA-IR                     | 2.7 [1.3-7.4]     | 3.0 [1.7-5.2]     | 0.829    |
| TG (mmol/L)                 | 1.3 [0.7-2.1]     | 1.4 [1.0-1.9]     | 0.601    |
| HDL-C (mmol/L)              | 1.6 ± 0.4         | 1.6 ± 0.4         | 0.845    |
| LDL-C (mmol/L)              | 3.2 ± 0.6         | 3.3 ± 0.6         | 0.634    |
| AST (IU/L)                  | 24.3 ± 11.9       | 25.8 ± 12.1       | 0.555    |
| ALT (IU/L)                  | 27.8 ± 19.1       | 28.6 ± 18.9       | 0.827    |
| γGTP (IU/L)                 | 32.7 ± 21.5       | 45.4 ± 52.0       | 0.173    |
| Leptin (ng/mL)              | 13.9 [7.2-28.2]   | 17.2 [10.0-23.6]  | 0.551    |
| Adiponectin (μg/mL)         | 7.6 [6.1-9.2]     | 7.83 [4.6-10.7]   | 0.677    |
| hsCRP (μg/mL)               | 0.6 [0.3-2.3]     | 0.91 [0.4-2.5]    | 0.369    |
| Estradiol (pg/mL)           | 82.3 ± 83.4       | 15.9 ± 12.2       | < 0.001* |
| FSH (IU/L)                  | 10.9 ± 18.5       | 40.2 ± 21.2       | < 0.001* |
| THBS1 (μg/mL)               | 19.2 [8.6-23.7]   | 13.7 [5.8-18.8]   | 0.159    |

Data are shown as the mean ± SD or median and interquartile ranges. Groups were compared by Welch's *t*-test or the Mann-Whitney U test. \**P* < 0.05.

Table S4. Characteristics and metabolic parameters of the study subjects before and after 6-month weight reduction therapy

| Variable                    | Male             |                  | Female            |                   |
|-----------------------------|------------------|------------------|-------------------|-------------------|
|                             | Baseline         | 6 months         | Baseline          | 6 months          |
| n                           | 34               |                  | 44                |                   |
| Age (years)                 | 51.3 ± 13.0      |                  | 52.1 ± 13.7       |                   |
| BMI (kg/m <sup>2</sup> )    | 29.0 ± 6.3       | 28.1 ± 6.1*      | 30.3 ± 5.6        | 29.4 ± 5.1*       |
| WC (cm)                     | 98.1 ± 14.1      | 95.7 ± 14.2*     | 98.0 ± 12.1       | 96.4 ± 13.0       |
| VAT area (cm <sup>2</sup> ) | 121.1 ± 53.2     | 99.9 ± 46.0*     | 103.1 ± 51.5      | 85.8 ± 38.7*      |
| SAT area (cm <sup>2</sup> ) | 246.0 ± 113.7    | 243.1 ± 130.2    | 294.9 ± 100.4     | 280.2 ± 92.2      |
| FPG (mmol/L)                | 6.1 ± 1.5        | 5.7 ± 1.3        | 6.4 ± 1.9         | 6.0 ± 2.0*        |
| HbA1c (%)                   | 6.2 ± 1.4        | 5.9 ± 0.8        | 6.6 ± 1.4         | 6.4 ± 1.4         |
| IRI (pmol/L)                | 43.2 [32.4-75.0] | 39.0 [32.4-75.6] | 69.9 [40.8-119.9] | 59.7 [43.1-88.8]* |
| HOMA-IR                     | 2.1 [1.5-3.4]    | 1.9 [1.3-2.9]    | 3.1 [1.8-6.8]     | 2.4 [1.7-4.0]*    |
| TG (mmol/L)                 | 1.1 [0.8-1.8]    | 1.1 [0.8-1.5]    | 1.3 [0.9-2.1]     | 1.1 [0.7-1.5]*    |
| HDL-C (mmol/L)              | 1.4 ± 0.4        | 1.3 ± 0.2        | 1.6 ± 0.4         | 1.6 ± 0.4         |
| LDL-C (mmol/L)              | 2.8 ± 0.7        | 2.7 ± 0.6        | 3.2 ± 0.6         | 3.1 ± 0.6         |
| AST (IU/L)                  | 23.6 ± 10.4      | 21.5 ± 5.5       | 23.0 ± 8.2        | 21.9 ± 7.2        |
| ALT (IU/L)                  | 32.1 ± 24.2      | 25.4 ± 10.0      | 26.3 ± 14.3       | 22.3 ± 10.2*      |
| γGTP (IU/L)                 | 42.0 ± 34.2      | 37.3 ± 24.7      | 47.4 ± 52.1       | 38.3 ± 39.6*      |
| Leptin (ng/mL)              | 6.3 [3.3-11.6]   | 4.6 [2.6-7.1]*   | 13.7 [9.2-20.4]   | 12.7 [6.5-17.9]*  |
| Adiponectin (μg/mL)         | 6.2 [5.1-9.1]    | 6.9 [5.4-10.9]   | 7.8 [5.3-9.5]     | 7.6 [5.9-10.8]    |
| hsCRP (μg/mL)               | 0.6 [0.3-1.0]    | 0.3 [0.2-0.9]    | 0.8 [0.3-2.1]     | 0.5 [0.3-1.3]     |
| THBS1 (μg/mL)               | 14.1 [9.6-17.5]  | 17.3 [13.3-19.7] | 18.1 [13.6-23.3]  | 15.6 [13.6-18.6]  |

Data are shown as the mean ± SD or median and interquartile ranges. Groups were compared by the paired *t*-test or Wilcoxon signed-rank test. \**P* < 0.05 vs. baseline data.
